# Supplementary material
Source: PubMed Central journal article supplement (PMC2214737)
Supplement: blood_blood-2007-07-101717_4.pdf [file blood_blood-2007-07-101717_4.pdf]

HCV Ab<sup>-</sup> (LDU 095)HCV<sup>+</sup> Polyclonal (1419)HCV<sup>+</sup> Clonal (1308)HCV<sup>+</sup> Clonal (1403)

A

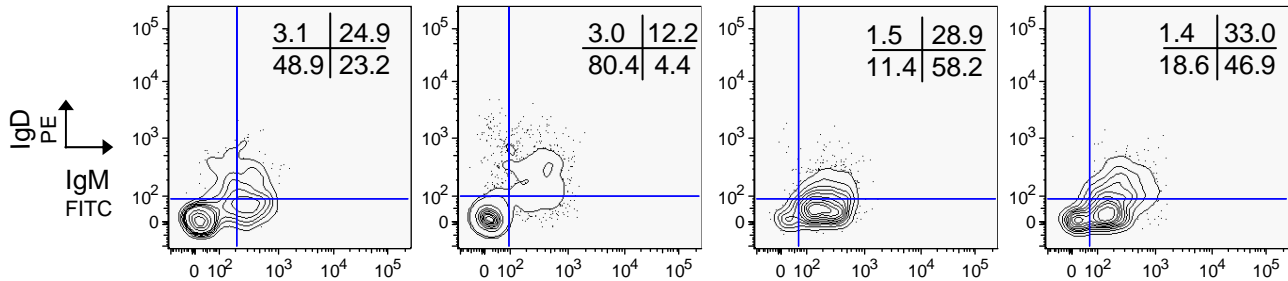

**CD19<sup>+</sup>, CD20<sup>+</sup>,  
κ<sup>+</sup>, CD27<sup>+</sup>**

B

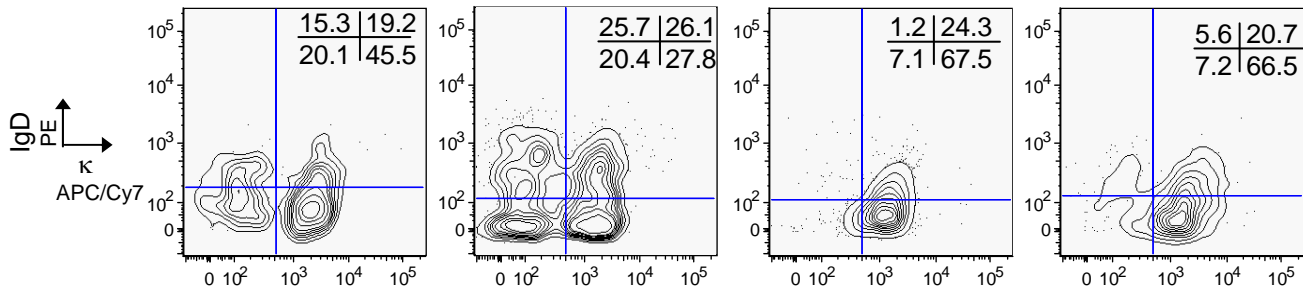

**CD19<sup>+</sup>, CD20<sup>+</sup>,  
IgM<sup>+</sup>, CD27<sup>+</sup>**
