# Supplementary material
Source: PubMed Central journal article supplement (PMC2214737)

A

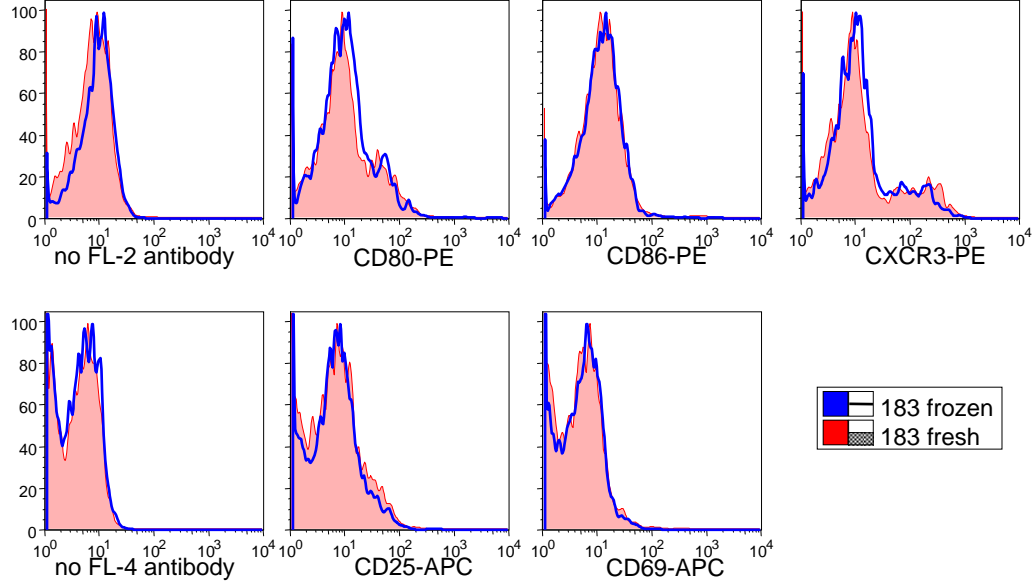

B

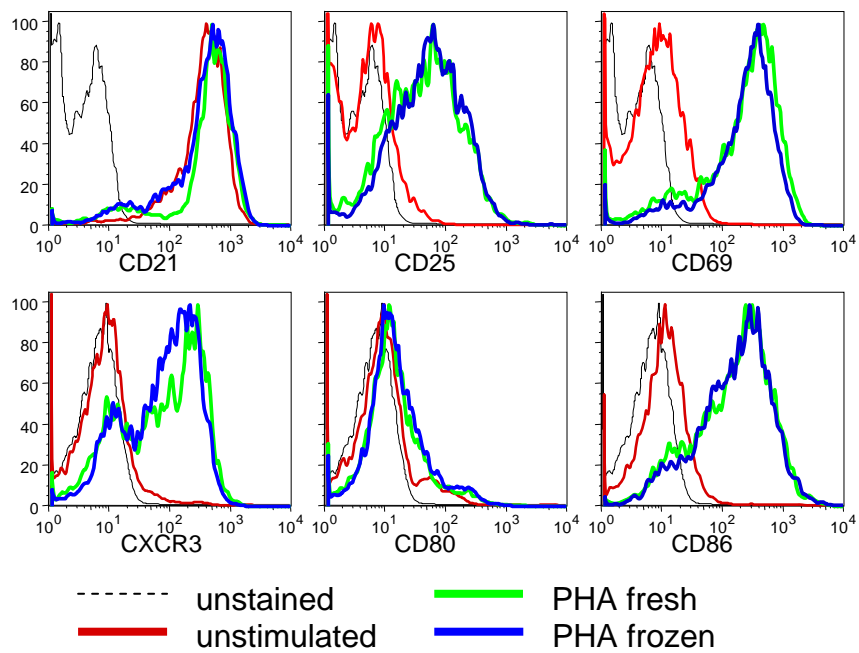

Supplement: blood_blood-2007-07-101717_1.pdf [file blood_blood-2007-07-101717_1.pdf]

A

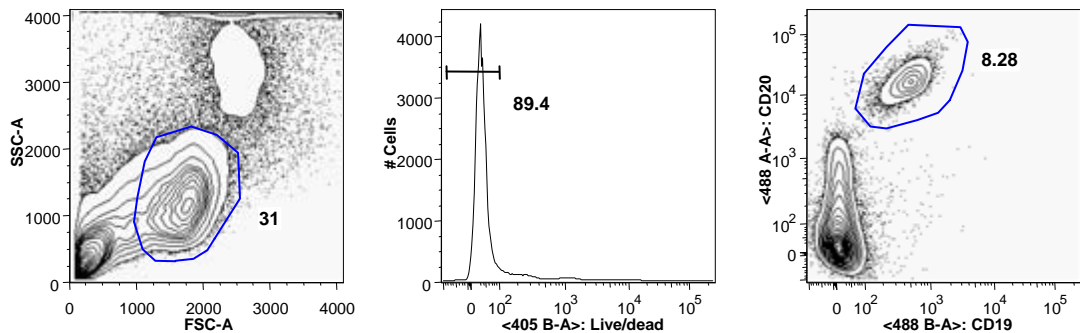

B

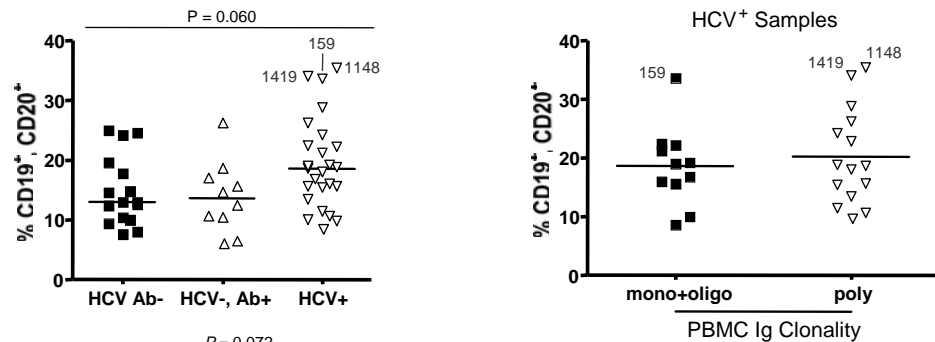

C

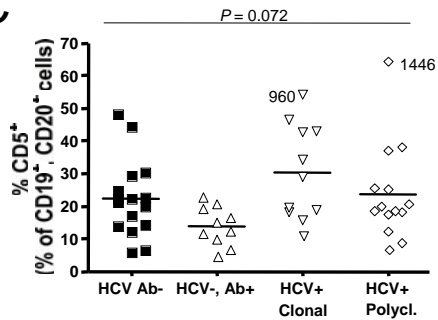

Supplement: blood_blood-2007-07-101717_2.pdf [file blood_blood-2007-07-101717_2.pdf]

HCV Ab- (LDU 095)    HCV+ Polyclonal (1419)    HCV+ Clonal (1308)    HCV+ Clonal (1403)

A

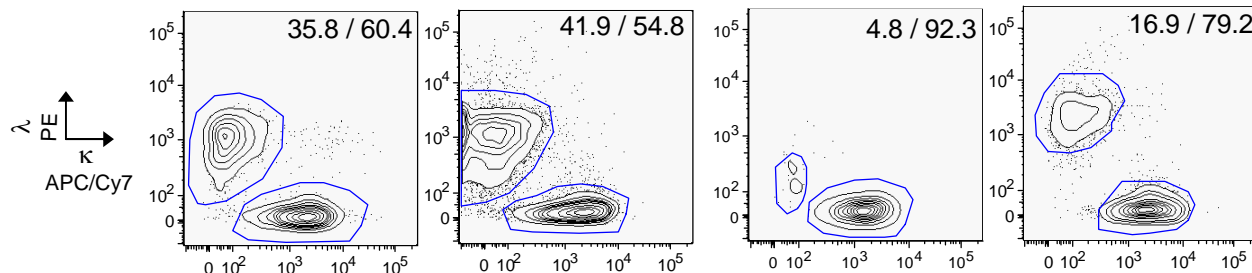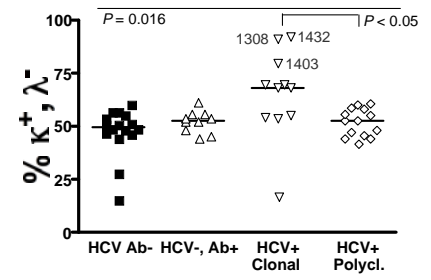

B

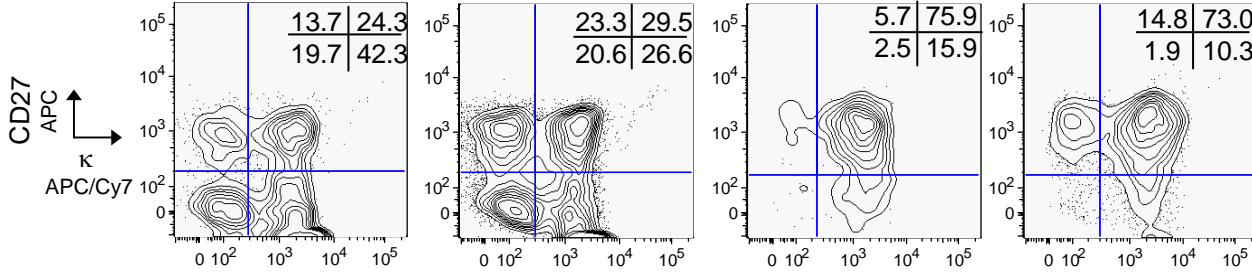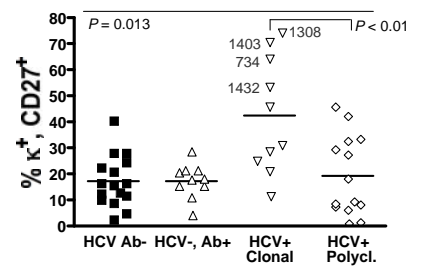

C

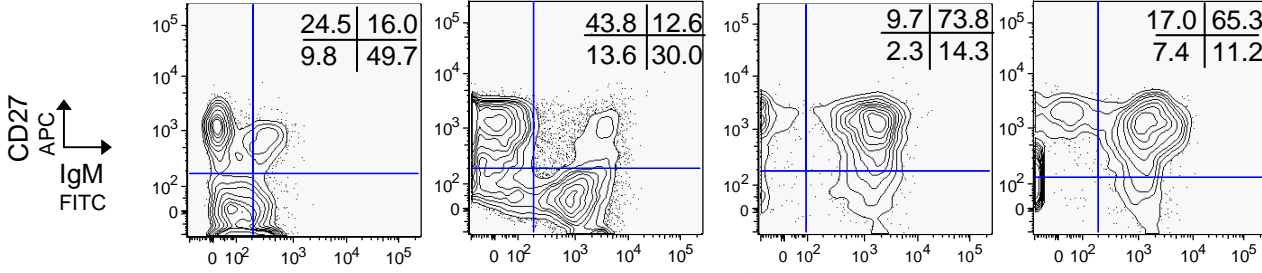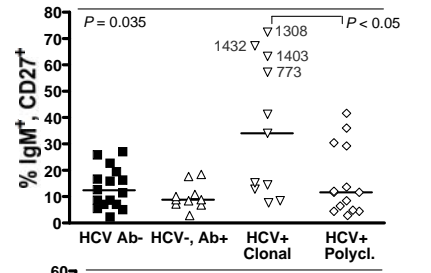

D

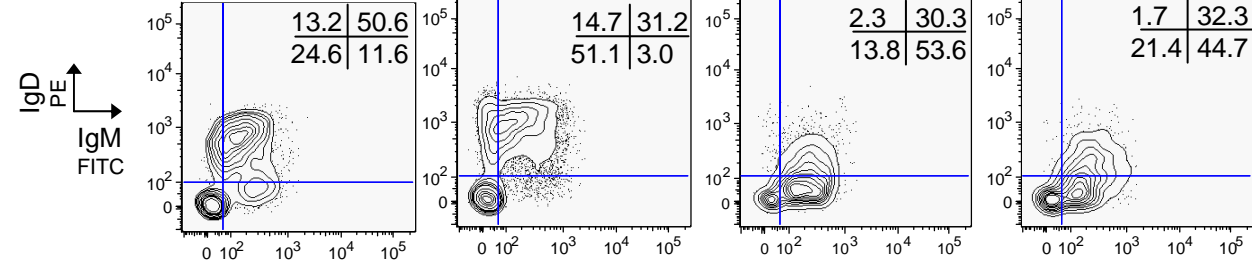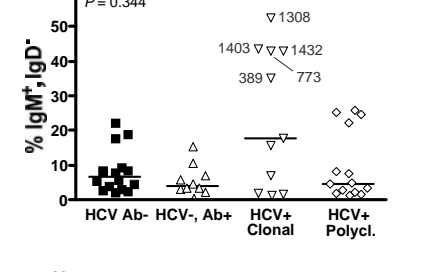

E

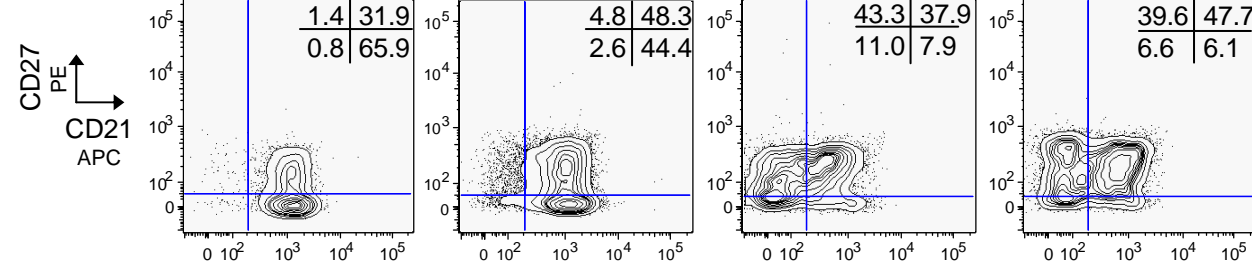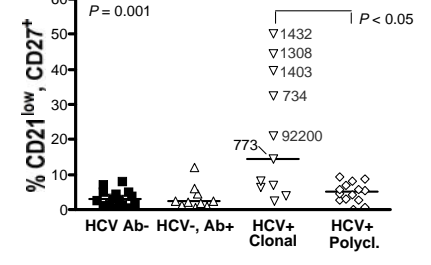

CD19+, CD20+

Supplement: blood_blood-2007-07-101717_3.pdf [file blood_blood-2007-07-101717_3.pdf]
